# Allele frequency dynamics under sex-biased demography and sex-specific inheritance in a pedigreed population

Rose M.H. Driscoll<sup>a,1</sup>, Felix E.G. Beaudry<sup>a,1,2</sup>, Elissa J. Cosgrove<sup>b</sup>, Reed Bowman<sup>c</sup>, John W. Fitzpatrick<sup>d</sup>, Stephan J. Schoech<sup>e</sup> and Nancy Chen<sup>a,2</sup>

<sup>a</sup>Department of Biology, University of Rochester, Rochester, NY 14627, <sup>b</sup>Department of Molecular Biology & Genetics, Cornell University, Ithaca, NY 14850, <sup>c</sup>Avian Ecology Program, Archbold Biological Station, Venus, FL 33960, <sup>d</sup>Cornell Lab of Ornithology, Cornell University, Ithaca, NY 14850, <sup>e</sup>Department of Biological Sciences, University of Memphis, Memphis, TN 38152, <sup>1</sup>Co-first author, <sup>2</sup>Corresponding authors

**ABSTRACT** Sex-biased demography, including sex-biased survival or migration, can impact allele frequency changes across the genome. In particular, we can expect different patterns of genetic variation on autosomes and sex chromosomes due to sex-specific differences in life histories, as well as differences in effective population size, transmission modes, and the strength and mode of selection. Here, we demonstrate the role that sex differences in life history played in shaping short-term evolutionary dynamics across the genome. We used a 25-year pedigree and genomic dataset from a long-studied population of Florida Scrub-Jays (*Aphelocoma coerulescens*) to directly characterize the relative roles of sex-biased demography and inheritance in shaping genome-wide allele frequency trajectories. We used gene dropping simulations to estimate individual genetic contributions to future generations and to model drift and immigration on the known pedigree. We quantified differential expected genetic contributions of males and females over time, showing the impact of sex-biased dispersal in a monogamous system. Due to female-biased dispersal, more autosomal variation is introduced by female immigrants. However, due to male-biased transmission, more Z variation is introduced by male immigrants. Finally, we partitioned the proportion of variance in allele frequency change through time due to male and female contributions. Overall, most allele frequency change is due to variance in survival and births. Males and females have similar contributions to autosomal allele frequency change, but males have higher contributions to allele frequency change on the Z chromosome. Our work shows the importance of understanding sex-specific demographic processes in accounting for genome-wide allele frequency change in wild populations.

**KEYWORDS** population genetics | pedigrees | sex chromosomes | sex-biased demography

## Introduction

A fundamental goal of evolutionary biology is to determine the roles of different evolutionary processes in governing allele frequency change over time. The realization that evolution can occur on ecological time scales has generated increased interest in characterizing the drivers of allele frequency change over short timescales in natural populations [1–4]. Furthermore, understanding evolution over contemporary timescales is especially important given its relevance to current issues such as public health [5], conservation policy [6, 7], and agricultural practices [8]. To date, most population genetic studies use allele frequencies estimated from present-day samples to make inferences about the evolutionary processes that generated the observed patterns of genetic variation [9, 10], though studies that directly track allele frequencies over time are becoming more common (*e.g.*, [11, 12]). Temporal genomic data coupled with knowledge of the population pedigree, or the relationships among all individuals in a population over time, can provide precise estimates of the mechanisms underlying short-term allele frequency dynamics [13].

Genome-wide, allele frequency change is driven by differential survival, reproduction, and dispersal among individuals. In other words, depending on their life history, different individuals have different genetic contributions to a population over time. The expected genetic contribution of an individual is defined as the expected number of alleles inherited from that individual present in the population in future generations, and is determined by both the number of descendants of an individual and the randomness of Mendelian segregation [14, 15]. Individual expected genetic contributions are expected to stabilize after a few generations and can be used to estimate individual reproductive values [10, 14, 15].

One important factor impacting an individual's genetic contribution over time is its sex, as there are often sex differences in life history. In sexually-reproducing organisms, the expected genetic contributions of males and females should be equal on average [10]. However, different sexes often have different life history traits: depending on their mating system, individuals of different sexes can differ in the variance in number of offspring (*i.e.*, reproductive success [16, 17]), dispersal likelihood and distance [18], or niche occupation [19]. These differences in life history traits can lead to population-level effects such as a biased adult sex ratio or sex-biased migration rates [20–22]. Differences in life history between individuals of different sexes may impact expected genetic contributions and therefore allele frequency change. Indeed, including sex increases the accuracy of modelling demographic changes [23, 24] and will likely help the

36 characterization of sources of allele frequency change over time.

37 Individual expected genetic contributions can vary across the genome. For example, sex chromosomes should have  
38 different patterns of expected genetic contributions compared to autosomes. The two most common sex chromosome  
39 systems include X and Y chromosomes, where females are XX and males XY (*e.g.*, in mammals, beetles, and many  
40 dipterans), and Z and W chromosomes, where females are ZW and males ZZ (*e.g.*, in birds, lepidopterans, and strawber-  
41 ries). As a result of sex-specific differences in transmission (inheritance rules) and ploidy (*e.g.*, hemizyosity), expected  
42 genetic contributions on sex chromosomes are disproportionately influenced by sex-biased demography. The X and Z  
43 chromosomes can have different effective population sizes than autosomes and are expected to experience more drift  
44 than the autosomes [25, 26]. Indeed, different patterns of genetic variation on autosomes and sex chromosomes are  
45 expected to reflect sex-specific differences in effective population size and transmission modes, as well as in life histories  
46 [21, 26–29].

47 Based on differences in effective population size between autosomes and sex chromosomes, two expectations arise  
48 [30–32]. First, males are expected to contribute  $\frac{2}{3}$  of Z variation, while females are expected to contribute  $\frac{1}{3}$ , based  
49 on the number of chromosomes in each sex [33]. Second, the ratio of Z to autosome diversity should equal  $\frac{3}{4}$  [26].  
50 Departures from these expectations can result from sex-biased demographic processes, fuelling the use of neutral genetic  
51 diversity ratios between autosomes and sex chromosomes to infer sex-biased demography over long timescales, (*i.e.*, » Ne  
52 generations). For example, the strength of sexual selection, defined as sex-biased variance in reproductive success [34],  
53 can be estimated from genetic diversity differences between X and autosomes [25, 35–37]. Similarly, sex-biased migration  
54 can be inferred from sex chromosome versus autosome neutral genetic diversity ratios [27, 38]. These endeavours,  
55 however, have important caveats. First, it is challenging (if not impossible) to disentangle which sex-biased processes  
56 are contributing to biased genetic diversity ratios when several processes occur jointly, especially in populations with  
57 overlapping generations of variable sizes [25]. Second, for inferences of sex-biased migration, timescale has been shown  
58 to have important impacts on genetic diversity ratios in humans [33, 39], but timescale is rarely considered in inferences  
59 of gene flow [40]. These caveats suggest that approaches complementary to neutral genetic diversity data are necessary  
60 to deepen our understanding of the impacts of sex-biased demography in natural populations.

61 One approach for studying sex-biased demography is using individual genetic contributions. Expected genetic  
62 contributions can be estimated from population pedigrees using analytical calculations [41, 42] or simulations on the  
63 pedigree (gene dropping; [43]). With the advent of high-throughput molecular sequencing, gene dropping has been  
64 adopted to simulate changes in allele frequency based on known genotypes. This method has been used to estimate the  
65 frequency of known recessive lethals in cattle [44], humans [45] and Soay sheep [46], as well as to identify alleles thought  
66 to be under positive selection in Florida Scrub-Jays [13], Soay Sheep [47] and domestic foxes [48]. Population pedigrees  
67 are therefore an invaluable resource for studying the impacts of sex-biased demography on allele frequency change over  
68 time.

69 A recent study characterized short-term allele frequency dynamics at autosomal loci in a population of Florida  
70 Scrub-Jays (*Aphelocoma coerulescens*) by combining simulations of expected genetic contributions with genomic data  
71 [13]. Florida Scrub-Jays are cooperatively breeding birds with a balanced sex ratio of breeding adults, as these jays pair  
72 monogamously [49]. Natal dispersal is limited and female-biased [50–52]. Pairs are socially and genetically monogamous  
73 ([53]). Previous work has found that immigration plays a large role in allele frequency change even in a large population  
74 of jays [13, 54]. A population of jays at Archbold Biological Station (hereafter Archbold) has been closely monitored for  
75 over 50 years, resulting in a detailed population pedigree with over 6,000 individuals. This study population provides an  
76 unrivalled opportunity to study individual-level effects on short-term allele frequency change.

77 Here, we extended the work of Chen *et al.* [13] by developing and applying gene dropping methods for sex chro-  
78 mosomes to directly evaluate the contributions of sex-biased demographic processes and sex-specific inheritance to  
79 changes in allele frequencies over time in the Florida Scrub-Jay. We first estimated the expected genetic contributions of  
80 individuals, contrasting the role of males and females as well as of immigrants grouped by sex. Using separate models to  
81 track different modes of inheritance, we compared the expected genetic contributions of males and females at autosomal  
82 and Z-linked loci. Next, to identify loci likely to be under selection, we incorporated genotype information and simulated  
83 changes in allele frequency over time given the pedigree. Finally, we partitioned the variance in allele frequency change  
84 between years across sexes and demographic groups, and quantified the contributions of males and females and different  
85 evolutionary processes to allele frequency change at autosomal and Z-linked loci.

## 86 **Methods**

### 87 ***Study population and pedigree***

88 A population of Florida Scrub-Jays at Archbold in Venus, Florida, USA, has been intensively monitored for multiple  
89 decades, the northern half since 1969 ([49]) and the southern half since 1989 ([55, 56]). Each bird in this population has  
90 been uniquely banded, making immigrants easy to identify. Immigrants are defined as birds born outside the study

91 population, but the source population of any given immigrant is not known. The entire population is surveyed every few  
92 months to provide detailed records of individual survival. Family groups are closely monitored to assess reproductive  
93 success, with new nestlings officially banded at 11 days of age. As a result of these detailed records, we have a fairly  
94 comprehensive pedigree of the entire population. To avoid the complications associated with study tract expansion in  
95 the 1980s, we truncated the pedigree at 1990, resulting in a pedigree with 6,936 individuals in total by the end of our  
96 study period in 2013. We note that there was a minor study tract expansion in the southern end of our field site in 1993  
97 that partially contributed to the observed peak in immigration in 1994 (as we cannot distinguish true immigrants from  
98 previously-unbanded residents in the new study tract area); however, we also observed an increase in known immigrants  
99 in the northern half of our field site (a consistently monitored area) in 1994. The addition of these territories did not  
100 impact overall immigration dynamics. Fieldwork at Archbold Biological Station was approved by the Institutional  
101 Animal Care and Use Committees at Cornell University (IACUC 2010-0015), the University of Memphis (0067), the  
102 University of Rochester (102153), and Archbold Biological Station (AUP-006-R), and was permitted by the U.S. Fish and  
103 Wildlife Service (TE824723-8, TE-117769), the U.S. Geological Survey (banding permits: 07732, 23098), and the Florida  
104 Fish and Wildlife Conservation Commission (LSSC-10-00205).

105 Since 1999, birds in the Archbold population have been sexed using molecular markers, following the protocol of  
106 Fridolfsson and Ellegren [57]. A previous study generated genotype data for 3,984 individuals using a custom Illumina  
107 iSelect Beadchip containing 15,416 SNPs [54]. These individuals were from a set of 68 territories that were consistently  
108 monitored since 1990, and included near-exhaustive sampling in 1989-1991, 1995, and 1999-2013. Here, we used data  
109 from a set of 10,731 autosomal SNPs (previously used in [13]; see [13, 54] for more information on filtering and quality  
110 control) along with 249 Z-linked and 19 pseudoautosomal SNPs with minor allele frequency > 0.05.

### 111 **Expected genetic contributions of males and females**

112 We begin by calculating the genealogical contribution of each individual, defined as the proportion of a given birth cohort  
113 that is descended from that individual. In contrast, the expected genetic contribution of an individual is the expected  
114 proportion of alleles in a given birth cohort inherited identical-by-descent from our focal individual. We estimated  
115 expected individual genetic contributions as the expected proportion of alleles in a nestling cohort that came from a  
116 specific (focal) individual. Expected individual genetic contributions depend on transmission patterns and therefore  
117 should differ for autosomal versus sex-linked loci.

118 For a given autosomal locus, fathers and mothers each transmit one of their two alleles randomly to each offspring.  
119 Thus, the expected genetic contribution of an individual may be obtained by tracing the transmission of their alleles  
120 through the pedigree. The expected genetic contribution of an individual at an autosomal locus ( $G_{auto}$ ) is:

$$G_{auto} = \frac{1}{n} \sum_m \sum_p \left(\frac{1}{2}\right)^{g_p} \quad (1)$$

121 where  $n$  is the number of nestlings in the birth cohort,  $m$  is the number of nestlings in the cohort related to the  
122 focal individual (their descendants),  $p$  is the number of paths in the pedigree linking the focal individual and a given  
123 descendant, and  $g_p$  is the number of generations between the focal individual and the descendant along a given path.

124 For a given Z chromosome locus, fathers transmit one of their two Z chromosomes randomly to each offspring, but  
125 mothers invariably transmit their single Z chromosome to their male offspring only. The estimated genetic contribution  
126 of an individual at a Z chromosome locus in a given year ( $G_Z$ ) is:

$$G_Z = \frac{1}{n} \sum_m \sum_p \left(\frac{1}{2}\right)^{h_p} \left(\frac{1}{2}\right)^{j_p} \left(1\right)^{k_p} \left(0\right)^{l_p} \quad (2)$$

127 where  $n$ ,  $m$ , and  $p$  are as described above.  $h_p$  represents the number of male-to-male (*i.e.*, father-to-son) transmission  
128 events,  $j_p$  represents the number of male-to-female (*i.e.*, father-to-daughter) transmission events,  $k_p$  represents the  
129 number of female-to-male (*i.e.*, mother-to-son) transmission events, and  $l_p$  represents the number of female-to-female (*i.e.*,  
130 mother-to-daughter) transmission events in a given path. Note that a female-to-female transmission anywhere in a path  
131 will always result in zero genetic contribution from the focal individual to the descendant along that path, as females  
132 never pass on their Z to their daughters. For a given path from a focal individual to a descendant,  $h_p + j_p + k_p + l_p = g_p$ .  
133 An equivalent way of estimating expected genetic contributions is to simulate the transfer of alleles down the pedigree  
134 using gene dropping, emulating random segregation at meiosis ([13]). This method is preferable because it allows us to  
135 determine the variance across loci around a calculated expectation and so we use the simulation method here.

136 To assess the expected autosomal genetic contributions of a single focal individual, we truncated the pedigree above  
137 the focal individual to make them a 'founder', *i.e.*, an individual with no known parents in the pedigree. We then assigned

138 the focal individual a genotype of '22' and all other founders a genotype of '11', simulated Mendelian transmission of  
139 alleles down the pedigree, and calculated the frequency of the '2' allele in year  $t$ . We repeated this process for one million  
140 iterations. To assess expected Z chromosome genetic contributions, we used a similar method, but adjusted transmission  
141 rules and assigned females a genotype of '2' or '1' for their single copy of the Z chromosome. For this process, we needed  
142 to know the sex of all descendants. For the 1,896 unsexed individuals in our population pedigree (all died as nestlings),  
143 we took a conservative approach and assigned individuals with missing sex information as male; since males are ZZ, this  
144 approach will minimize Z-autosome differences.

145 We estimated the genealogical and mean expected genetic contributions over time for a set of 926 breeders that bred in  
146 the population between 1990 and 2013. These individuals were all born before 2002 and died by the end of 2014, so our  
147 estimates should capture all of their offspring as well as some grand-offspring, great-grand-offspring, etc. To test the  
148 relationship between an individual's sex and expected individual genetic contributions to the population in 2013, we fit  
149 linear models for expected genetic contributions with genealogical contribution, sex, and their interaction as independent  
150 variables. We next fit linear models for the ratio of Z/autosome expected genetic contributions using the expected genetic  
151 contribution on the Z chromosome as the dependent variable and autosomal expected contribution as the independent  
152 variable. We also modeled expected genetic contributions on the Z with autosomal expected contribution, sex, and their  
153 interaction as independent variables.

### 154 **Expected genetic contributions of male and female immigrants**

155 To quantify the effects of sex-biased migration, we estimated the expected genetic contributions of male and female  
156 immigrants for both autosomal and Z-linked loci. Starting with immigrants entering the population in 1991, we assigned  
157 all male immigrants a genotype of '22' and all other founders a genotype of '11', performed gene dropping using the  
158 appropriate transmission rules as described above, and calculated the frequency of the '2' allele in each year. We repeated  
159 this process one million times to find the total expected genetic contributions of all male immigrants as a group. We  
160 repeated this process for female immigrants. Note that the total expected genetic contribution of immigrants here is  
161 cumulative and includes the contributions of all descendants of immigrants. We used linear models to test for trends in  
162 immigration rate and sex ratios of immigrants over time. We included the number of immigrants in our model of sex  
163 ratios. Finally, we used linear models to assess the relationship between immigrant cohort size and the expected genetic  
164 contribution of that immigrant cohort to the population 15 years later (the longest time period for which we have a large  
165 enough data set).

### 166 **Neutral allele dynamics and selection**

167 Previous work evaluated signals of selection on 10,731 autosomal loci and detected 18 SNPs with significant changes in  
168 allele frequency across 1999-2013 [13]. Here, we tested for selection on the Z chromosome using 249 non-pseudoautosomal  
169 SNPs and 19 pseudoautosomal SNPs. To simulate the neutral behavior of Z-linked alleles, we performed gene dropping  
170 simulations for each SNP using known founder genotypes. We trimmed the 6936-individual pedigree to remove any  
171 founders with missing genotype data for the focal SNP. We re-coded the offspring of trimmed founders as founders, and  
172 repeated this process until all founders had genotype data. Thus, the pedigree used for each SNP could vary slightly  
173 based on patterns of missing data at that locus. After trimming, we used gene dropping to simulate the transmission of  
174 alleles down the pedigree one million times. We used Z chromosome transmission rules for the 249 non-pseudoautosomal  
175 Z-linked SNPs, and autosomal transmission rules for the 19 pseudoautosomal loci. From the simulated genotypes in  
176 each iteration, we calculated the expected allele frequency shifts using the genotyped nestlings born in each year in  
177 a core set of about 68 consistently monitored territories (2841 nestlings in total over 1990-2013). These gene dropping  
178 iterations resulted in a distribution of changes in allele frequency over time, conditional on the pedigree. We compared  
179 the distribution of allele frequency change expected under neutrality to observed allele frequency changes between 1999  
180 and 2013 and in adjacent years during that time period. We determined p-values for allele frequency change at each  
181 SNP by counting the number of simulations in which the simulated value was further from the median of the expected  
182 distribution than the observed value. We performed false discovery rate (FDR) correction of p-values for all comparisons  
183 across both the autosomes [13] and the Z (10,999 SNPs total) and applied a threshold of  $FDR < 0.25$  to assess significance.

### 184 **Model of variance in allele frequencies**

185 To determine the sources of genome-wide allele frequency change for autosomes and the Z chromosome, we extended the  
186 model from [13] to incorporate the sex of individuals. Like [13], we assumed only three sources of allele frequency change:  
187 differences in survival, reproduction (*i.e.*, new births), and immigration among individuals. We classified individuals in  
188 our population census each year as survivors, immigrants, or nestlings/births. For this analysis (in contrast to previous  
189 analyses), immigrating individuals were only counted as immigrants the year they first appear in the population and  
190 were categorized as survivors in following years. We further subdivided each demographic group into males and females  
191 in order to account for the possibility that individuals of different sexes contributed differently to each source of allele



frequency change. We included individuals in the population for a given year if they were observed during at least two months between March and June, and considered individuals who disappeared from the population for one or more years but later returned to have been survivors in the intervening time.

We calculated allele frequency change between consecutive years by contrasting allele frequencies in each category (male survivors, male births, male immigrants, female survivors, female births, female immigrants) in each year with the allele frequency of the entire population in the previous year. Let  $N_t$  be the total number of individuals in the population in year  $t$ . Let  $N_{M,s}$  be the number of males who survived from year  $t - 1$  to year  $t$ ,  $N_{M,i}$  be the number of males who immigrated into the population in year  $t$ , and  $N_{M,b}$  be the number of males born in the population in year  $t$ . Likewise, let  $N_{F,s}$  be the number of females who survived from year  $t - 1$  to year  $t$ ,  $N_{F,i}$  be the number of females who immigrated into the population in year  $t$ , and  $N_{F,b}$  be the number of females born in the population in year  $t$ . Note that  $N_t = N_{M,s} + N_{M,i} + N_{M,b} + N_{F,s} + N_{F,i} + N_{F,b}$ .

We constructed two models, one for autosomal loci and one for Z-linked loci. Let the allele frequency of a given demographic group  $j$  be  $p_{M,j}$  for males and  $p_{F,j}$  for females, *e.g.*,  $p_{F,s}$  is the allele frequency of female survivors. The change in allele frequencies between two adjacent years for an autosomal locus is:

$$\Delta p_A = \frac{N_{F,s}}{N_t}(p_{F,s} - p_{t-1}) + \frac{N_{F,i}}{N_t}(p_{F,i} - p_{t-1}) + \frac{N_{F,b}}{N_t}(p_{F,b} - p_{t-1}) + \frac{N_{M,s}}{N_t}(p_{M,s} - p_{t-1}) + \frac{N_{M,i}}{N_t}(p_{M,i} - p_{t-1}) + \frac{N_{M,b}}{N_t}(p_{M,b} - p_{t-1}) \quad (3)$$

Here, the contribution of each category to the overall change in allele frequency over time is a function of the proportion of alleles in the population from that category in year  $t$  (equivalent to the proportion of individuals in that category) and the difference in allele frequencies between that category in year  $t$  (*e.g.*, female survivors,  $p_{F,s}$ ) and the entire population from the year before ( $p_{t-1}$ ).

Similarly, the change in allele frequencies between two years for a Z-linked locus is:

$$\Delta p_Z = \frac{N_{F,s}}{N_{F,t} + 2N_{M,t}}(p_{F,s} - p_{t-1}) + \frac{N_{F,i}}{N_{F,t} + 2N_{M,t}}(p_{F,i} - p_{t-1}) + \frac{N_{F,b}}{N_{F,t} + 2N_{M,t}}(p_{F,b} - p_{t-1}) + \frac{2N_{M,s}}{N_{F,t} + 2N_{M,t}}(p_{M,s} - p_{t-1}) + \frac{2N_{M,i}}{N_{F,t} + 2N_{M,t}}(p_{M,i} - p_{t-1}) + \frac{2N_{M,b}}{N_{F,t} + 2N_{M,t}}(p_{M,b} - p_{t-1}) \quad (4)$$

Note that males have two copies of the Z while females only have one copy of the Z, which impacts the total number of alleles in the population and the relative weighting of male vs. female categories.

For both models, we further partitioned allele frequency change due to births,  $\text{Var}(p_{M,b} - p_{t-1})$  and  $\text{Var}(p_{F,b} - p_{t-1})$ , into contributions of variation in family size and Mendelian segregation of alleles from heterozygous parents in order to understand the relative roles of these two factors.

Using equations 3 and 4 and accounting for family size and Mendelian noise, we calculated the variance in allele frequencies across autosomal or Z-linked loci in each category, as well as the covariances between categories, *e.g.*, between survival and birth. Pseudoautosomal SNPs were removed in this analysis. We assumed that immigrants in a given year are unrelated to survivors and therefore set all covariances between immigrants and survivors to zero. In addition, for Z-linked loci, female survivors and female immigrants cannot transmit alleles to female nestlings (births), so we also set covariances between female survivors and female nestlings and between female immigrants and female nestlings to zero. We then calculated the proportion of total allele frequency change between a given pair of consecutive years contributed by each variance and covariance term.

While we have a complete census of all individuals in the population, not every individual is genotyped or sexed (Fig. S1). To deal with missing genotype data, we corrected each term for sampling error, estimated empirically via simulations. Briefly, we assigned genotypes to all individuals in the population in 1990 based on an allele frequency drawn from the empirical allele frequency distribution and then simulated Mendelian transmission (of autosomes or of the Z chromosome) forward in time for 100,000 replicates. For our Z chromosome simulations, we randomly assigned unsexed individuals as males or females based on the empirical sex ratio, which is approximately 50:50. We estimated allele frequencies from the subset of individuals who were genotyped and subtracted the population allele frequency to obtain the sampling error.

We used a bootstrapping approach to generate confidence intervals for our variance and covariance estimates. We sampled SNPs in 3.4 Mb windows along the genome 1,000 times with replacement. A 3.4 Mb window size was chosen to allow at least 1 window per chromosome, as the smallest chromosome in the current Florida Scrub-Jay genome assembly is 3.4 Mb. Windows smaller than 3.4 Mb, on unplaced scaffolds, or with less than 5 SNPs were discarded.

236 Across autosomes, this windowed approach resulted in 299 windows containing between 5 and 257 SNPs, with 50  
 237 SNPs/window on average. On the Z, SNPs were split between 21 windows, ranging from 5-83 SNPs. To ensure that our  
 238 chosen window size (3.4 Mb) was likely to break apart linkage, we estimated levels of linkage disequilibrium (LD) in our  
 239 study population using the 'ld-window-r2' function in plink [58] to estimate pairwise LD between SNPs in each of our  
 240 linkage groups. We fit an exponential decay curve for the relationship between pairwise LD and distance between SNPs  
 241 and found that, on average, LD decayed around 1 Mb (Fig. S2). We repeated the above sampling and error estimation  
 242 steps for each window.

243 We ran an additional set of models that assumed a 50:50 sex ratio for each demographic group (survivors, immigrants,  
 244 and births). This assumption is fairly reasonable for survivors and births, but not for immigrants (Fig. S1). However,  
 245 these models allowed us to account for a specific situation in which survivors, who make up a large proportion of the  
 246 previous year's population, have a similar mean allele frequency to the total allele frequency from last year ( $p_{t-1}$ ). When  
 247 the group of survivors are subdivided into males and females, the mean allele frequency of one group will, by chance,  
 248 be above  $p_{t-1}$ , and the mean of the other group below  $p_{t-1}$ , creating a negative covariance between male and female  
 249 survivors. By assuming a 50:50 sex ratio in our additional set of models, we were able to compare the allele frequency  
 250 of each category to the allele frequency of individuals of that sex the previous year (*i.e.*,  $p_{M,t-1}$  or  $p_{F,t-1}$ ) and avoid the  
 251 artifact described above.

252 Let  $N_{M,t}$  be the total number of males in the population in year  $t$  and  $N_{F,t}$  be the total number of females in the  
 253 population in year  $t$ . The change in allele frequencies between two years for an autosomal locus, assuming a 50:50 sex  
 254 ratio, is:

$$\Delta p = \left[ \frac{1}{2} \right] \left[ \frac{N_{M,s}}{N_{M,t}} (p_{M,s} - p_{M,t-1}) + \frac{N_{M,i}}{N_{M,t}} (p_{M,i} - p_{M,t-1}) + \frac{N_{M,b}}{N_{M,t}} (p_{M,b} - p_{M,t-1}) \right] \\ + \left[ \frac{1}{2} \right] \left[ \frac{N_{F,s}}{N_{F,t}} (p_{F,s} - p_{F,t-1}) + \frac{N_{F,i}}{N_{F,t}} (p_{F,i} - p_{F,t-1}) + \frac{N_{F,b}}{N_{F,t}} (p_{F,b} - p_{F,t-1}) \right] \quad (5)$$

255 For the full derivation of the autosomal model and for the model for Z-linked loci, see Appendix B of the supplementary  
 256 materials.

## 257 **Implementation**

258 We implemented gene dropping in python and C++ and used this software to conduct the simulations for expected  
 259 genetic contributions and tests of selection. We performed analyses and visualization in R v. 3.6.3 [59] using packages  
 260 base, stats, plyr [60], dplyr [61], ggplot2 [62], cowplot [63], and kinship2 [64].

261 We implemented the allele frequency variance models in R v. 4.1.1 [59] using packages base, stats, foreach [65],  
 262 doParallel [66], plyr, and dplyr. We used the packages ggplot2 and cowplot for visualization.

## 263 **Data Availability**

264 Scripts are available on github and data are available on Figshare [links to come].

## 265 **Results**

### 266 **Expected genetic contributions of males and females**

267 We first focused on the contributions of individual breeding adults to future generations. Each individual breeder has  
 268 both a genealogical and expected genetic contribution to the future. Here, we define the genealogical contribution of an  
 269 individual as the proportion of a given birth cohort that is descended from that individual. In contrast, the expected  
 270 genetic contribution of an individual is the expected proportion of alleles in a given birth cohort inherited identical-  
 271 by-descent from our focal individual. An individual's expected genetic contribution differs from their genealogical  
 272 contribution because not every chromosome is passed down to the next generation. Expected genetic contributions  
 273 are also impacted by transmission rules; sex-biased transmission of the Z chromosome results in different genetic  
 274 contributions of individuals at autosomal versus Z loci.

275 To illustrate the effect of sex-biased transmission on individual genetic contributions across the genome, we contrasted  
 276 the expected genetic contributions for autosomal and Z-linked loci over time for a male and female who are each others'  
 277 exclusive mates. This pair first bred in 2001, produced 15 offspring together, and had a total of 223 descendants by 2013  
 278 (Fig 1A). Since these breeders did not pair with any other individuals over the course of their lives, they have the same  
 279 descendants and thus equal genealogical contributions. At a given autosomal locus, the male and female had equal  
 280 expected genetic contributions (Fig 1B). The only differences in the expected autosomal genetic contributions of the  
 281 male and female arose from the stochastic nature of the simulations we used to estimate expected genetic contributions;

282 after 1,000,000 iterations, their values were essentially identical. In contrast, the expected genetic contributions on the Z  
 283 chromosome tended to be considerably higher for the male than for the female between 2005 and 2013 (Fig. 1C).

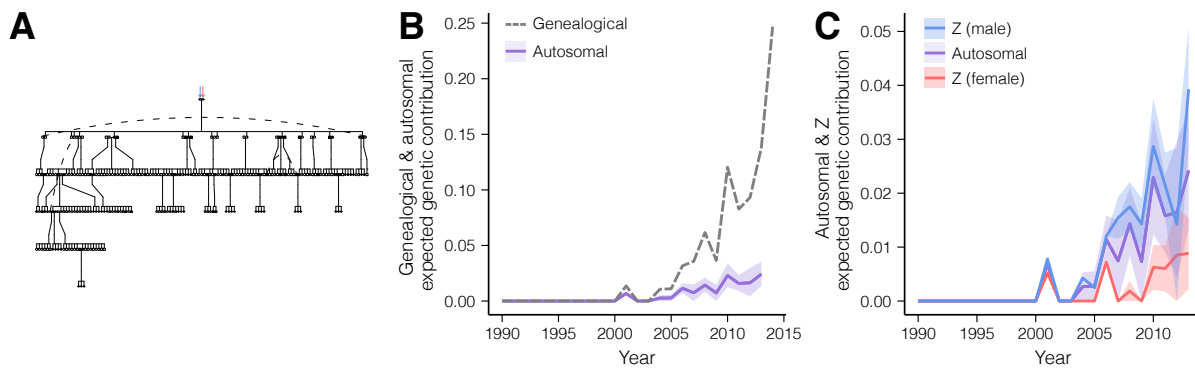

**Figure 1** (A) Pedigree of descendants and (B, C) genealogical and genetic contributions over time for a male-female pair that first bred in 2001 with total lifetime reproductive success of 15. In A, dashed lines connect individuals who appear more than once in the pedigree. In B, dashed lines indicate the proportion of nestlings in each cohort who are genealogical descendants of the pair. Solid lines indicate the mean expected genetic contribution at a neutral autosomal or Z chromosome locus for each year, and pale shading indicates the 95% confidence interval. Expected autosomal genetic contributions are shown in purple, and expected Z genetic contributions of the male partner are shown in blue and of the female in red.

284 Moving to the population level, we compared the genealogical and mean expected genetic contributions to our study  
 285 population in 2013 of a set of 926 individuals who bred in our study population between 1990 and 2013. In this set of  
 286 breeders, 317 males and 340 females have 0 descendants by 2013. For breeders with a least one descendant in 2013,  
 287 genealogical contributions to the study population in 2013 ranged from 0.00337 to 0.313 (mean = 0.0534) for males and  
 288 from 0.00337 to 0.313 (mean = 0.0544) for females. The similar range of genealogical contributions between males and  
 289 females was unsurprising given this species is monogamous and the mortality rate is the same between the sexes [53, 67].  
 290 Expected genetic contributions for an autosomal locus ranged from 0.000420 to 0.0242 (mean = 0.00492) for males and  
 291 from 0.000420 to 0.0242 (mean = 0.00488) for females. Expected genetic contributions for a Z chromosome locus ranged  
 292 from 0 to 0.0393 (mean = 0.00658) for males and from 0 to 0.0207 (mean = 0.00368) for females.

293 We found that for an autosomal locus, the relationship between genealogical and expected genetic contributions did not  
 294 significantly differ for males versus females (Fig 2A; genealogical contribution:  $p < 2e-16$ ; sex:  $p = 0.82$ ; genealogical\*sex :  
 295  $p = 0.16$ ). For a Z chromosome locus, on the other hand, the relationship between genealogical and expected genetic  
 296 contributions for males versus females was strikingly different (Fig 2B; genealogical contribution:  $p < 2e-16$ ; sex:  $p = 0.26$ ;  
 297 genealogical\*sex :  $p < 2e-16$ ). The genealogical estimate for females (genealogical\*sex:  $\beta = 0.040$ , Standard Error (SE)  
 298 = 0.0044) was 48% lower than the genealogical estimate for males (genealogical\*sex:  $\beta = 0.083$ , SE = 0.0032). For both  
 299 autosomal and Z chromosome loci, expected genetic contributions were much lower than genealogical contributions,  
 300 consistent with theoretical predictions (the gray dotted lines in Figs 2A and 2B show a 1:1 relationship).

301 We directly compared the expected genetic contributions of an autosomal locus and a Z locus. Mathematically, the  
 302 ratio of male Z/autosome expected genetic contributions is  $\frac{4}{3}$  while female Z/autosome expected genetic contributions is  
 303  $\frac{2}{3}$  (See Appendix A). When sex is not considered, average expected genetic contributions to Z and autosomal loci should  
 304 be equal because we defined expected genetic contribution as a proportion of the total number of Z chromosomes or  
 305 autosomes respectively. As anticipated, the ratio of Z/autosome expected genetic contributions of individuals without  
 306 regard to sex was close to 1 (slope = 0.97, SE = 0.018). When sex was added to the model (which explained 17% more  
 307 variance than the model without sex), the Z/autosome ratio of expected genetic contributions was significantly impacted  
 308 by sex ( $p < 2e-16$ ); the Z/autosome estimate for females (0.6747, SE = 0.034) was lower than the Z/autosome estimate  
 309 for males (1.25, SE = 0.024) by 54%. The Z/autosome ratio of expected genetic contributions for females matched our  
 310 expectations ( $\frac{2}{3}$ ), while the Z/autosome ratio for males was slightly less than the expected  $\frac{4}{3}$  (Fig. 2C).

311 We further explored the relationship between genealogical and expected genetic contributions for autosomes and the  
 312 Z chromosome by comparing the contributions of male and female partners. While Florida Scrub-Jays are monogamous,  
 313 many individuals pair again if their partner dies. For the small subset of pairs that only bred with each other throughout  
 314 their entire life (*i.e.*, lifelong monogamous pairs), the male and female partners always had equal expected autosomal  
 315 genetic contributions in 2013 (Fig S3A), but some males had higher expected Z genetic contributions than their mate,  
 316 especially when the sex ratio of their offspring was skewed towards female offspring (Fig. S3B). Recall that mothers only

317 transmit their Z chromosomes to their sons and therefore do not contribute Z alleles to their daughters or any descendants  
 318 of their daughters. We examined the pedigrees of all descendants for the six lifelong monogamous pairs with unequal  
 319 expected Z genetic contributions between partners. The three female breeders with zero expected Z genetic contributions  
 320 in 2013 had only daughters that contributed to the 2013 birth cohort, while the three female breeders with greater than  
 321 zero expected Z genetic contributions had descendants in the 2013 birth cohort via both sons and daughters. The fact that  
 322 Florida Scrub-Jays can have multiple mates throughout their lifetime may increase the difference in expected genetic  
 323 contributions between male-female pairs. To confirm this hypothesis, we compared the expected genetic contributions of  
 324 all male and female partners and tracked the number of mates each individual had throughout their lifetime (Fig. S3C  
 325 and D). For breeding pairs in which the female breeder had more mates throughout her lifetime compared to the male  
 326 breeder, the female tended to have higher expected autosomal genetic contributions than her mate, and the opposite was  
 327 true if the male breeder had a higher number of mates. We found a similar pattern for the Z chromosome. However,  
 328 many females had lower expected Z genetic contributions than their male partners despite having a higher number of  
 329 mates because of the important role the sex ratio of descendants plays in determining expected Z genetic contributions.

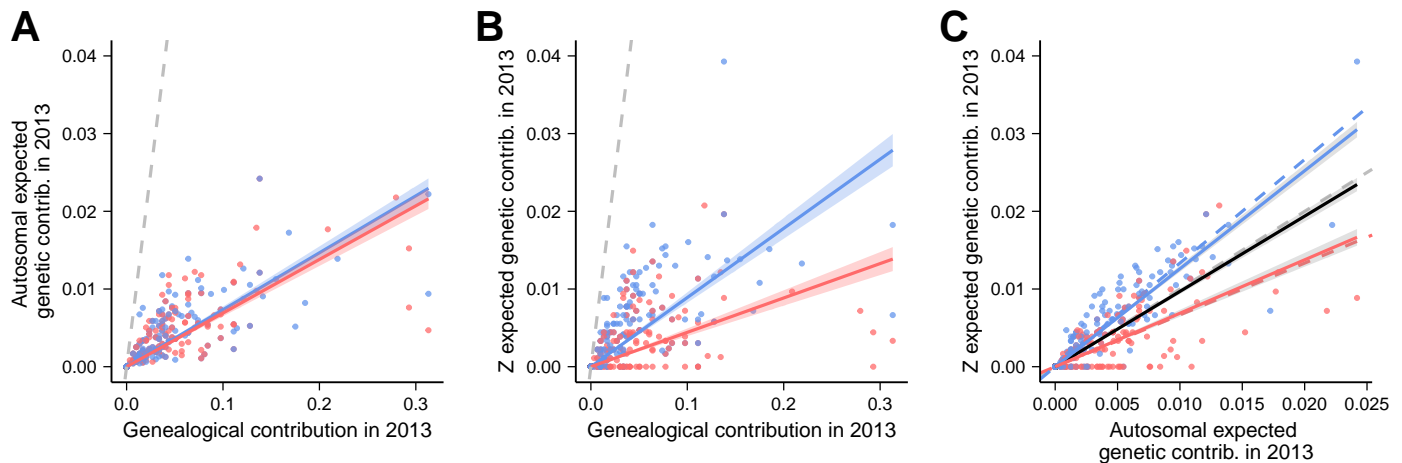

**Figure 2** Genealogical and expected genetic contributions to the population in 2013 at (A) a neutral autosomal and (B) a neutral Z chromosome locus for all male breeders ( $n = 351$ , blue) and female breeders ( $n = 378$ , red) born before 2002 who bred in the population between 1990 and 2013. The dotted lines indicate a one-to-one relationship. (C) Expected genetic contributions to the population in 2013 at a neutral autosomal locus versus expected genetic contributions to the population in 2013 at a neutral Z chromosome locus for the breeders shown in parts A and B. The black line shows the Z/autosome relationship without regard for sex, the blue line shows the Z/autosome relationship for males and the red line shows the Z/autosome relationship for females. Solid lines show estimates from linear models for each group, and dashed lines show theoretical expectations (See Appendix A).

### 330 **Expected genetic contributions of immigrants**

331 Florida Scrub-Jays have female-biased dispersal, and previous work showed high levels of immigration into our study  
 332 population over time [13, 54]. Between 1990 and 2012, the number of immigrant breeders appearing in Archbold each  
 333 year was generally small (6-40/year; Fig. 3A). The immigrant breeder sex ratio was female-biased in 16 of 22 years  
 334 (mean proportion of male immigrants across years = 0.39). Immigration decreased significantly over time ( $-0.46 \pm 0.065$   
 335 immigrants/year,  $R^2 = 0.32$ ,  $p_{immigrant} = 3.23e-10$ ), and sex was not a significant factor in this change ( $p_{sex} = 0.231$ ).

336 To investigate the role of sex-biased migration, we calculated the expected genetic contributions of male and female  
 337 immigrants who entered the population between 1990 and 2013. Female immigrants had significantly higher expected  
 338 genetic contributions at autosomal loci than male immigrants by 2013 (Fig. 3B; significance based on non-overlapping  
 339 95% confidence intervals). However, despite female-biased immigration rates, the expected genetic contribution of male  
 340 immigrants at Z-linked loci was significantly higher than that of female immigrants until 2011 (Fig. 3C). Consistent with  
 341 previous work [13], 75% of the autosomal alleles in the 2013 birth cohort were contributed by immigrants arriving since  
 342 1990, 62% of which was driven by female immigrants. On the Z chromosome, the total expected genetic contribution of  
 343 male and female immigrants was also 75% in 2013 (Fig. 3C), with each sex contributing half (50%) of the incoming alleles.  
 344 When we normalized expected Z genetic contributions by expected autosomal genetic contributions (thus accounting  
 345 for sex-biased immigration), the Z/autosome ratio approached  $\frac{4}{3}$  for male immigrants and  $\frac{2}{3}$  for female immigrants, as  
 346 expected (Fig. S4).



347 While all immigrants could have sustained genetic contributions to a population over time, gene flow could alternatively  
 348 be driven by a few immigrant individuals with large contributions, in which case immigrant cohort size would  
 349 not be a good predictor of gene flow. To this end, we assessed the relationship between immigrant cohort size and total  
 350 expected genetic contribution of that immigrant cohort to individuals born 15 years later. We found that immigrant cohort  
 351 size was a good predictor of autosomal (Fig 3D) and Z-linked (Fig 3E) expected genetic contributions. At autosomal  
 352 loci, we found that the expected genetic contribution of a given immigrant cohort significantly increased with increasing  
 353 cohort size, but there was no significant effect of sex on the rate of increase ( $\beta = 0.0025 \pm 0.0008$ ,  $R^2 = 0.35$ ,  $p_{slope} = 0.012$ ,  
 354  $p_{sex} = 0.34$ ). Immigrant sex had an impact for Z-linked loci: immigrant cohort size was not significantly associated with  
 355 expected Z genetic contribution after 15 years for female immigrants ( $\beta = 0.0016 \pm 0.00095$ ,  $p = 0.1199$ ) but was significant  
 356 for male immigrants ( $\beta = 0.019 \pm 0.0084$ ,  $p = 0.041$ ; full model  $R^2 = 0.25$ ). Overall, we saw a similar relationship between  
 357 immigrant cohort size and expected genetic contributions of male and female immigrant cohorts on the autosomes but  
 358 our results suggest male immigrant cohort size has larger impact than female immigrant cohort size on expected genetic  
 359 contributions on the Z.

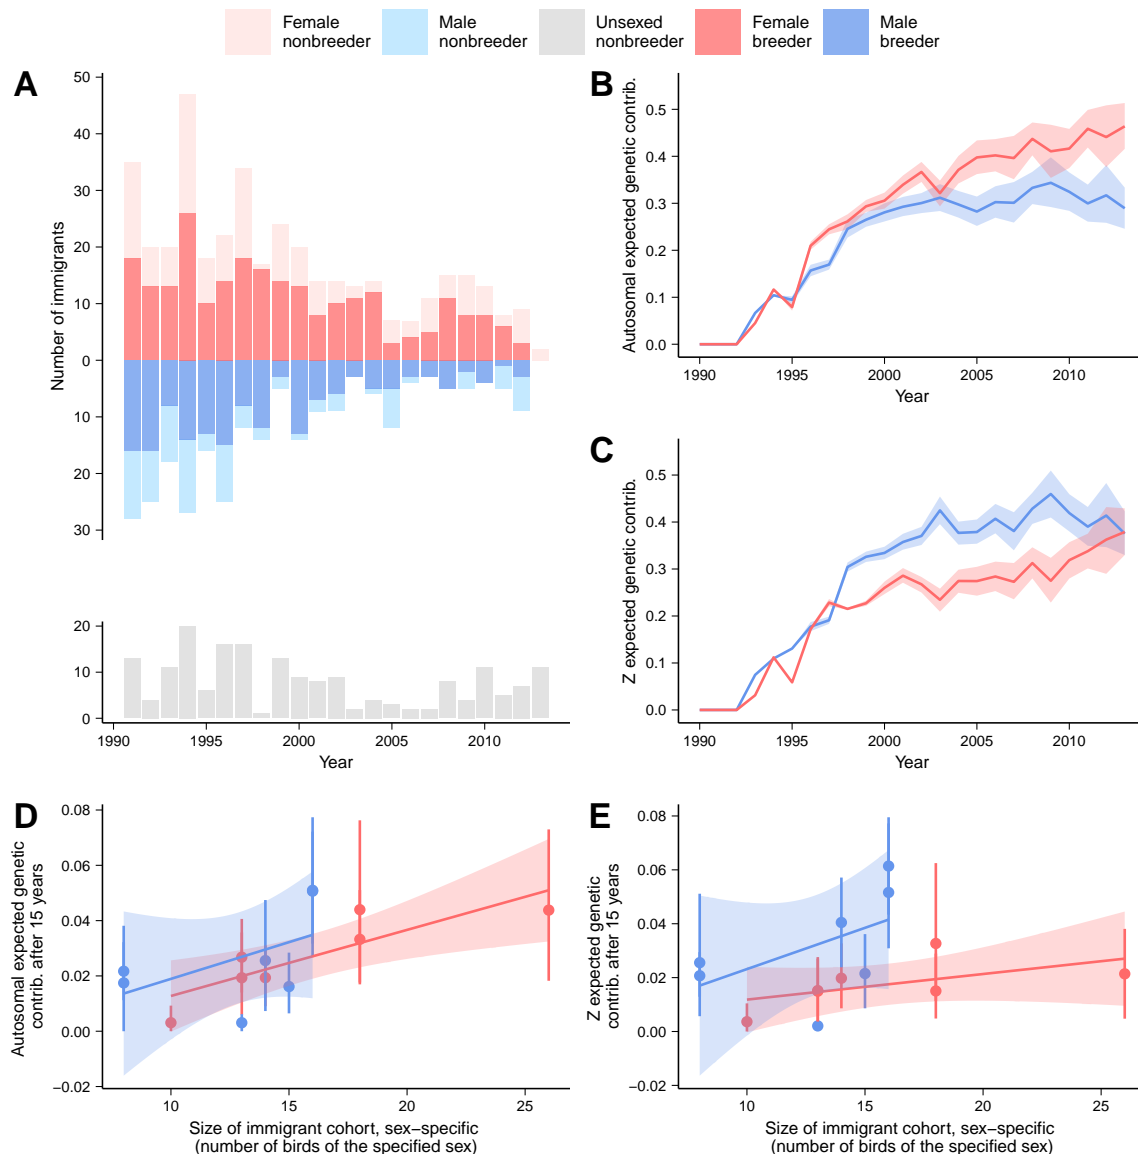

**Figure 3** (A) The number of female immigrants (shown in light/dark red for nonbreeders/breeders), male immigrants (shown in light/dark blue for nonbreeders/breeders), and immigrants of unknown sex (all nonbreeders, shown in gray) arriving in the Archbold population each year between 1990 and 2013. (B, C) The expected genetic contribution of male and female immigrants appearing in the population after 1990 at (B) a neutral autosomal locus and (C) a neutral Z chromosome locus. (D, E) The expected genetic contribution of immigrant cohorts between 1991 and 1997 to the nestling cohort 15 years later at (D) a neutral autosomal locus and (E) a neutral Z chromosome locus.

## 360 **Signals of Selection**

361 We next evaluated signals of selection on 249 Z-linked loci and 19 SNPs in the PAR (which follows autosomal transmission  
362 patterns) by comparing the change in allele frequencies expected under the pedigree to the observed change [13]. We  
363 identified loci at which the observed change in allele frequency between 1999 and 2013 was larger than expected from our  
364 simulations as likely to be under directional selection. Across 1999-2013, we found a single Z-linked SNP that showed  
365 significantly larger shifts in allele frequency than would be expected from gene flow and drift alone at a FDR of 0.25 (Fig.  
366 S5). We also compared pairs of consecutive years (*e.g.*, 1999 and 2000, 2000 and 2001, etc.) and found a total of 4 Z-linked  
367 SNPs—1 from the 1999-2000 comparison and 3 from the 2000-2001 comparison—that showed significantly more allele  
368 frequency change than would be expected from gene flow and drift alone from one year to the next at a FDR of 0.25  
369 (Fig. S6). All significant loci were Z-linked; we found no significant sites among the 19 PAR SNPs. We reassessed the  
370 10,731 autosomal loci examined by [13] after correcting for multiple comparisons across both autosomal and Z loci and  
371 found results were unchanged except, in the consecutive year comparisons, 4 autosomal SNPs—1 from the 2001-2002  
372 comparison and 3 from the 2003-2004 comparison—which were previously significantly different between years are no  
373 longer significant (FDR > 0.25).

## 374 **Drivers of allele frequency change**

375 To quantify the relative roles of different evolutionary processes, we partitioned genome-wide allele frequency change  
376 between consecutive years among demographic groups (survivors, immigrants, nestlings/births; Fig. 4A), assuming  
377 survival/reproduction and gene flow are the only sources of allele frequency change (which is true for neutral alleles).  
378 Building on the model of [13], we additionally accounted for and assessed sex-specific demography and sex-specific  
379 inheritance by allowing differences between males and females in each demographic group (Fig. 4A) and creating  
380 separate models that use the transmission rules for the Z chromosome.

381 We first looked at the relative contributions of males, females, and male-female covariance to overall allele frequency  
382 change (Fig. 4B). For autosomes, the proportion of variance contributed by males and by females over years was generally  
383 similar, ranging from 0.34 to 0.60 for males and from 0.40 to 0.55 in females. Males had a similar contribution to variance  
384 in allele frequencies on the Z (0.42 to 0.60) while females contributed proportionally less to total allele frequency change  
385 on the Z (0.19 to 0.45) than on the autosomes. We also looked at the relative contributions of survivors, immigrants,  
386 births, and covariances between groups to overall allele frequency change (Fig. 4C). At autosomal loci, our findings were  
387 similar to the analysis of [13], with survivors, births, and survivor-birth covariance consistently contributing between 84  
388 and 98% of the variance. Between 88 and 99% of the variance in allele frequencies on the Z chromosome was also due to  
389 variation in survival, reproduction or survivor-birth covariance.

390 Next, we investigated the contributions of each sexed demographic group (Fig. 5). At autosomal loci, there was  
391 significant overlap in our confidence intervals between male and female survivors, suggesting both contribute similarly  
392 to allele frequency change from year to year. At Z-linked loci, male survivors tended to contribute more to variance in  
393 allele frequencies than females, but confidence intervals overlapped. We calculated the ratio between contributions to Z  
394 and autosomal allele frequency change and found that the Z/autosome ratio for female survivors approximated the  
395 expected  $\frac{2}{3}$ , while the Z/autosome ratio for male survivors was more similar to  $\frac{1}{1}$  (Fig. S7).

396 The covariance between male and female survivors declined across years on the Z, although it was positive in the first  
397 few years of the study period and confidence intervals overlapped zero in all years. Covariance between male and female  
398 survivors was consistently negative at autosomal loci, though confidence intervals again overlapped zero in all years (Fig.  
399 5). The observed negative covariance could be a mathematical artifact arising because survivors were a large proportion  
400 of the population from the previous year (see Methods). Briefly, a negative covariance could arise simply by splitting the  
401 allele frequency of the whole population in year  $t - 1$  into separate sexed groups in year  $t$ . We confirmed this hypothesis  
402 by running a second set of models that compared allele frequencies between males/females in each demographic group  
403 with the sex-specific population allele frequency from the previous year. These models did not have the same biases  
404 based on properties of the mean, and indeed we found near-zero covariances between male and female survivors (Fig.  
405 S8).

406 Confidence intervals for the variance in allele frequency change due to male and female births overlapped for  
407 autosomal loci. On the Z, male births tended to play a larger role than female births, but confidence intervals overlapped  
408 here as well. For female births, the ratio between contributions to Z and autosomal allele frequency change was around  $\frac{2}{3}$ ,  
409 while for male births the ratio was around  $\frac{4}{3}$  (Fig. S7). We further separated the variance due to births into contributions  
410 of Mendelian segregation in heterozygous individuals and of variation in family size (Fig. S9). The ratio between  
411 contributions to Z and autosomal allele frequency change was approximately  $\frac{2}{3}$  for both female and male Mendelian  
412 noise (Fig. S10). For female family size, the Z/autosome ratio was  $\frac{2}{3}$ , while for male family size the ratio was slightly  
413 above  $\frac{4}{3}$ . The covariance between male and female births was not significantly different from zero for both autosomes  
414 and the Z.

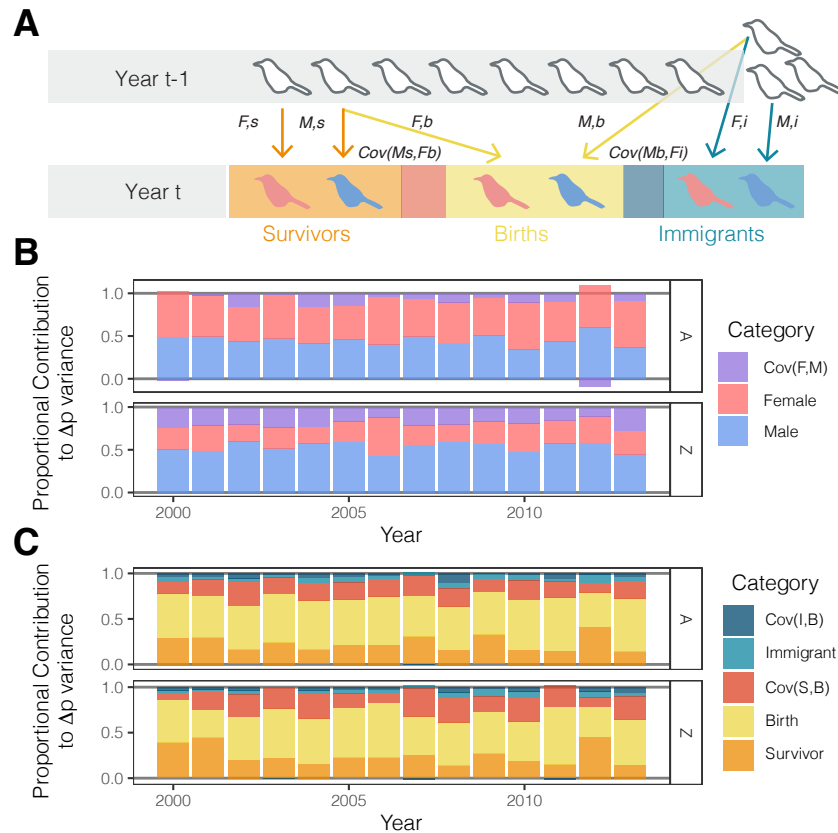

**Figure 4** (A) Schematic of the allele frequency variance partitioning model. Arrows show contributions to allele frequency change through different demographic processes: survival, reproduction (birth), and immigration.  $F,s$  = female survivors;  $M,s$  = male survivors;  $F,b$  = female births;  $M,b$  = male births;  $F,i$  = female immigrants; and  $M,i$  = male immigrants. (B, C) Results of the model. (B) Allele frequency variance partitioning for males (blue), females (pink), and covariance between males and females (purple) for autosomal loci (top) and Z-linked loci (bottom). (C) Allele frequency variance partitioning for survivors (orange), births (yellow) and immigrants (teal), as well as covariance between survivors and births (Cov(S,B), red) and covariance between immigrants and births (Cov(I,B), blue) for autosomal loci (top) and Z-linked loci (bottom).

415 We found that, per year, immigration played a small role in allele frequency change (-0.0026 to 0.056), about an order  
 416 of magnitude less than births (-0.088 to 0.50) or survival (-0.23 to 0.40). At autosomal loci, female immigrants tended  
 417 to contribute more than males, although the confidence intervals overlapped. On the Z, male immigrants contributed  
 418 more than females. The Z/autosome ratio for male immigrants was well above  $\frac{4}{3}$ , while the Z/autosome ratio for female  
 419 immigrants was much lower than  $\frac{2}{3}$  (Fig. S7).

## 420 Discussion

421 The use of temporal samples to understand allele frequency change over time is a growing area of research in evolutionary  
 422 biology. Here, we investigated the effects of sex-biased demography, sex-specific inheritance, and their interplay on  
 423 expected genetic contributions and allele frequency change over short timescales. Using expected genetic contributions  
 424 obtained by simulating the transmission of alleles down the pedigree, we found similar average contributions of the  
 425 sexes on autosomes, but highly male-biased contributions to the Z chromosome. We also partitioned the proportion of  
 426 allele frequency change among consecutive years due to sex-specific survival/reproduction and gene flow. Consistent  
 427 with previous work [13], we found that overall, differential birth and survival drives the majority of allele frequency  
 428 change. While contributions to allele frequency change at autosomal loci are equally distributed between the sexes, males  
 429 contribute more to allele frequency change at Z-linked loci than females. Together, our results offer unique insights into  
 430 the impacts of sex-specific processes on evolution over ecologically relevant timescales.

431 Here, we estimated an individual's expected genetic contribution as the expected proportion of alleles in each birth  
 432 cohort inherited identical-by-descent from the focal individual. After 10 generations, the expected genetic contributions

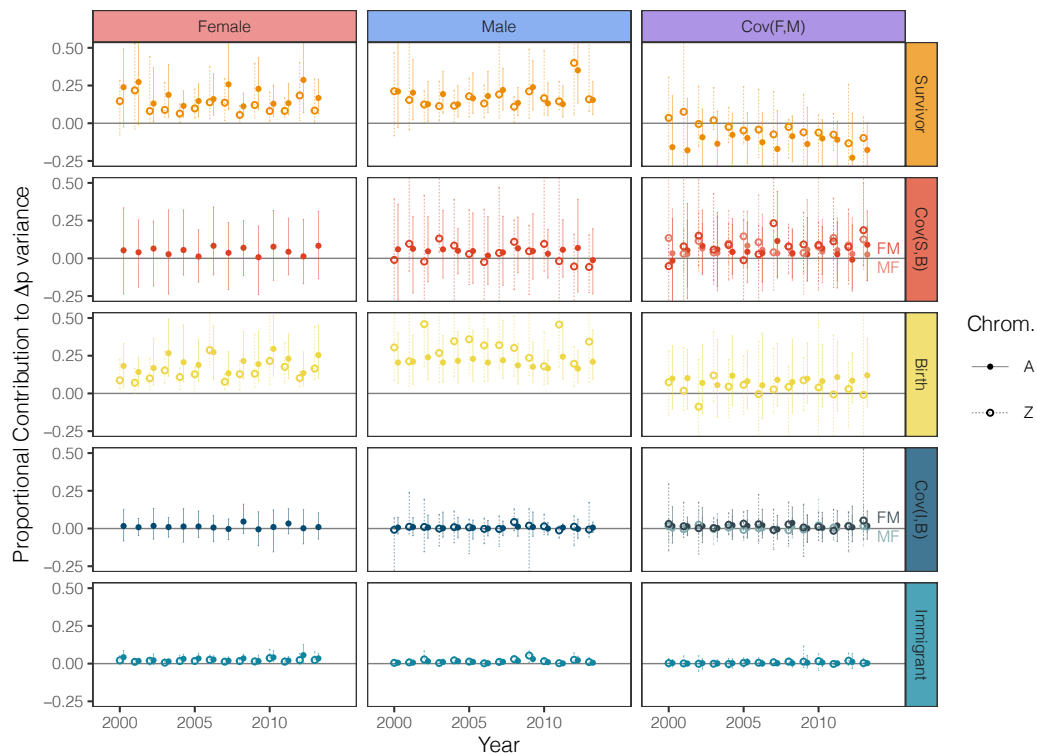

**Figure 5** Contributions to the variance in allele frequency change across years of three demographic processes among the sexes. Solid circles and solid lines show the estimates for autosomal loci; open circles and dotted lines show the estimates for Z-linked loci. Vertical bars show 95% confidence intervals from bootstrapping. Cov(S,B) indicates covariance between survivors and births, and Cov(I,B) indicates covariance between immigrants and births. In the plot showing the covariance between survivors and births of different sexes, the lines labeled "MF" indicate cov(male survivors, female births) and the lines labeled "FM" indicate cov(female survivors, male births); likewise for the covariance between immigrants and births of different sexes.

of an individual will stabilize across years at the reproductive value for that individual [15, 68, 69]. An individual's reproductive value, a concept first introduced by Fisher [10] as a way of understanding allele frequency change in age-structured populations, is obtained from an individual's relative contribution to the future gene pool and is an accurate measure of fitness [15, 70]. Reproductive values are traditionally estimated in population ecology as a weighted average of present and future reproduction by an individual at a given age [71]. While the reproductive value is a highly accurate measure of an individual's fitness, the expected genetic contributions of an individual captures both differences in fitness between individuals but also chance changes in demography on very short timescales [72]. Given that Florida Scrub-Jays have an estimated generation time of 5 years (Nguyen *et al.*, in prep.), we expect an individual Florida Scrub-Jay's expected genetic contribution to converge to its reproductive value within 50 years [15]. We found that the ratio of expected genetic contributions for autosomes and Z hover around  $\frac{2}{3}$  for females and  $\frac{4}{3}$  for males, suggesting that the expected genetic contributions of groups (*e.g.*, all individuals of a given sex) can stabilize on much shorter timescales than the expected genetic contributions of individuals (Appendix A). Our work supports our growing theoretical understanding of differences in expected genetic contributions [73] and reproductive values on sex chromosomes [29, 74]. Further understanding and quantifying the relationship between reproductive value on autosomes versus Z chromosomes is an important question for future work.

To quantify the contributions of different evolutionary processes and sexes to the variance in allele frequency change from year to year, we partitioned the variance in allele frequency change among sexes and demographic groups for autosomes and the Z chromosome. For the majority of the terms in our model, males contributed  $\frac{4}{3}$  as much on the Z chromosome compared to autosomes, and females contributed  $\frac{2}{3}$  as much on the Z compared to autosomes. These ratios are strikingly similar to those expected from the differences in effective population size between autosomal and sex-linked regions of the genome [25]. In fact, our results suggest that sex-biased survival or reproductive success have little impact on allele frequency change in the Florida Scrub-Jay; the only potentially sex-biased process is immigration. Indeed, the Florida Scrub-Jay is a simple case study from a population genetic standpoint. Florida Scrub-Jays are monogamous



456 with a 50:50 breeder sex ratio and equal variance in reproductive success for males and females [49]. Nonetheless, some  
457 terms in our allele frequency partitioning model departed from the  $\frac{2}{3}$  and  $\frac{4}{3}$  trend. First, when we separated allele  
458 frequency change due to births into the contributions of family size variation and Mendelian (random) assortment of  
459 chromosomes, the role of random assortment on the Z was  $\frac{2}{3}$  that of the autosomal term for both males and females (Fig.  
460 S10). This observation is to be expected as, for Z chromosomes, only one assortment event occurs per parent-offspring  
461 triad (during transmission from father to offspring), and thus all offspring regardless of sex have reduced change in allele  
462 frequencies on the Z chromosome compared to autosomes that is due to random assortment of chromosomes. Second,  
463 the proportion of allele frequency change contributed by the male survival term has a 1:1 Z/autosome ratio, which is  
464 lower than other ratios. There are several sources of variation that might impact this correlation, most notably the allele  
465 frequencies themselves, so we expect this correlation to be complex and are not presently able to pinpoint why this ratio  
466 is 1:1. Third, we observed no correlation between allele frequency change contributed by female immigrants on the Z  
467 and allele frequency change contributed by female immigrants on autosomes, in contrast to a strong correlation between  
468 Z and autosomal allele frequency variance in most categories. Future work could focus on the variation in Z/autosome  
469 ratios between demographic groups discovered here.

470 The Florida Scrub-Jay offers a useful test of the impact of sex-biased migration rates on short-term allele frequency  
471 dynamics: in our study population of jays, even though new immigrants (*i.e.*, immigrants that just arrived that year)  
472 only make up a small proportion of the census population size in any given year, nearly a quarter of breeders in each  
473 year were once immigrants. Previous work on these jays [51] found higher identity-by-descent for the Z chromosome  
474 compared to the autosomes at short distances due to both a lower effective population size of the Z and female-biased  
475 dispersal. Here we showed that, due to sex-biased immigration, female immigrants have higher autosomal contributions  
476 than male immigrants. However, due to sex-biased ploidy and transmission of the Z, male immigrants had higher Z  
477 contributions than female immigrants, consistent with expectations.

478 Our results also offer insights into the impact of sex-specific differences in variance in reproductive success. By  
479 following changes in allele frequency between years separately for males and females, we evaluated the impact of  
480 differences in life history between the sexes and their covariance on allele frequencies on the Z and autosomes. The  
481 general increase in the covariance between males and females on the Z compared to the autosomes is likely due to  
482 differences in transmission rules: because mothers do not transmit a Z chromosome to their daughters, daughters are  
483 more likely to share alleles with their brothers on the Z than on autosomes. However, by breaking down the contributions  
484 of covariances between males and females for survival and birth (reproduction) to allele frequency change, we may be  
485 able to evaluate whether sex-biases in reproductive success result in allele frequency change [75]. In the Florida Scrub-Jay,  
486 we find the negative covariance in survival between the sexes is best explained by random changes in the adult sex ratio  
487 between years rather than by a systematic difference between the sexes. Future application of our method to systems  
488 with more complex mating systems, life histories, and demographies is likely to be highly informative of the propensity  
489 of sexual selection and sexual conflict to impact allele frequency changes on short timescales.

490 While this study employed  $\sim 250$  Z-linked SNPs, we expect we effectively captured the history of the the Z chromosome  
491 in the Florida Scrub-Jay because the average distance between our SNPs is smaller than the average breakdown in linkage  
492 disequilibrium. However, our analysis of variance on the Z yielded large bootstrap intervals, so denser genotype data  
493 would give us more power to detect significant differences. Additionally, while we included the 19 PAR SNPs in our  
494 tests of selection, we do not include the PAR in our analysis of expected genetic contributions on the Z, nor that of allele  
495 frequency change on the Z; expected genetic contribution simulations for the Z were performed using the transmission  
496 rules for Z-linked loci not in the PAR. Given the unique evolutionary trajectory of pseudoautosomal alleles [76], future  
497 work could expand on our analysis of the PAR.

498 Overall, we showed that both sex-biased demography and sex-biased transmission had a strong impact on Z chromo-  
499 some dynamics in a population of Florida Scrub-Jays. We found that proportional contributions of males and females to  
500 Z chromosomes compared to autosomes follow a straightforward  $\frac{4}{3}$ - $\frac{2}{3}$  pattern in nearly every case, even on a relatively  
501 short evolutionary timescale. Our Beadchip dataset only captures common, variant sites; ongoing whole genome  
502 resequencing efforts will allow us to look at invariant sites and therefore tackle estimates of genetic diversity and test for  
503 a  $\frac{3}{4}$  Z/autosome diversity pattern. In addition, future work that traces the inheritance of haplotypes down the pedigree  
504 as opposed to single SNPs would allow the characterization of actual, realized genetic contributions of individuals across  
505 the genome and provide a more detailed picture of how sex-biased demography and sex-biased transmission influence  
506 short-term evolutionary dynamics.

## 507 Acknowledgments

508 We would like to thank Graham Coop for his help with developing the allele frequency partitioning model and the Chen  
509 and Coop labs for feedback on the manuscript. Thank you to the many students and staff at Archbold Biological Station  
510 who collected field data. We acknowledge funding from the National Science Foundation (NSF grants DEB0855879 and

511 DEB1257628) and National Institutes of Health (NIH grant R35GM133412). R.M.H.D. was supported by NSF Graduate  
512 Research Fellowship 1939268, and F.E.G.B. was supported by NIH grant R35GM133412.

## 513 References

- 514 1. Hairston Jr, N. G., Ellner, S. P., Geber, M. A., Yoshida, T. & Fox, J. A. Rapid evolution and the convergence of  
515 ecological and evolutionary time. *Ecol. Lett.* **8**, 1114–1127 (2005).
- 516 2. Carroll, S. P., Hendry, A. P., Reznick, D. N. & Fox, C. W. Evolution on ecological time-scales. *Funct. Ecol.* **21**, 387–393  
517 (2007).
- 518 3. Schoener, T. W. The newest synthesis: understanding the interplay of evolutionary and ecological dynamics. *Science*  
519 **331**, 426–429 (2011).
- 520 4. Messer, P. W., Ellner, S. P. & Hairston Jr, N. G. Can Population Genetics Adapt to Rapid Evolution? *Trends Genet.* **32**,  
521 408–418 (2016).
- 522 5. Pennings, P. S. Standing genetic variation and the evolution of drug resistance in HIV. *PLoS Comput. Biol.* **8**,  
523 e1002527 (2012).
- 524 6. Losos, J. B. et al. Evolutionary biology for the 21st century. *PLoS Biol.* **11**, e1001466 (2013).
- 525 7. Eizaguirre, C. & Baltazar-Soares, M. Evolutionary conservation-evaluating the adaptive potential of species.  
526 *Evol. Appl.* **7**, 963–967 (2014).
- 527 8. Kreiner, J. M. et al. Multiple modes of convergent adaptation in the spread of glyphosate-resistant *Amaranthus*  
528 *tuberculatus*. *Proc. Natl. Acad. Sci. U. S. A.* **116**, 21076–21084 (2019).
- 529 9. Wright, S. Systems of Mating. I. The biometric relations between parent and offspring. *Genetics* **6**, 111–123 (1921).
- 530 10. Fisher, R. A. *The genetical theory of natural selection* (1930).
- 531 11. Bergland, A. O., Behrman, E. L., O'Brien, K. R., Schmidt, P. S. & Petrov, D. A. Genomic evidence of rapid and stable  
532 adaptive oscillations over seasonal time scales in *Drosophila*. *PLoS Genet.* **10**, e1004775 (2014).
- 533 12. Therkildsen, N. O., Wilder, A. P., Conover, D. O., Munch, S. B., Baumann, H. & Palumbi, S. R. Contrasting genomic  
534 shifts underlie parallel phenotypic evolution in response to fishing. *Science* **365**, 487–490 (2019).
- 535 13. Chen, N., Juric, I., Cosgrove, E. J., Bowman, R., Fitzpatrick, J. W., Schoech, S. J., Clark, A. G. & Coop, G. Allele  
536 frequency dynamics in a pedigreed natural population. *Proc. Natl. Acad. Sci. U. S. A.* **116**, 2158–2164 (2019).
- 537 14. Chang, J. T. Recent common ancestors of all present-day individuals. *Adv. Appl. Probab.* **31**, 1002–1026 (1999).
- 538 15. Barton, N. H. & Etheridge, A. M. The relation between reproductive value and genetic contribution. *Genetics* **188**,  
539 953–973 (2011).
- 540 16. Arnold, S. J. Bateman's principles and the measurement of sexual selection in plants and animals. *Am. Nat.* **144**,  
541 S126–S149 (1994).
- 542 17. Janicke, T., Häderer, I. K., Lajeunesse, M. J. & Anthes, N. Darwinian sex roles confirmed across the animal kingdom.  
543 *Sci Adv* **2**, e1500983 (2016).
- 544 18. Li, X.-Y. & Kokko, H. Sex-biased dispersal: a review of the theory. *Biol. Rev. Camb. Philos. Soc.* **94**, 721–736.
- 545 19. De Lisle, S. P. Understanding the evolution of ecological sex differences: integrating character displacement and the  
546 Darwin-Bateman paradigm. *Evol. Lett.* **3**, 434–447 (2019).
- 547 20. Wright, S. Size of population and breeding structure in relation to evolution. *Science* **87**, 430–431 (1938).
- 548 21. Caballero, A. On the effective size of populations with separate sexes, with particular reference to sex-linked genes.  
549 *Genetics* **139**, 1007–1011 (1995).
- 550 22. Laporte, V. & Charlesworth, B. Effective population size and population subdivision in demographically structured  
551 populations. *Genetics* **162**, 501–519 (2002).
- 552 23. Eberhart-Phillips, L. J. et al. Sex-specific early survival drives adult sex ratio bias in snowy plovers and impacts  
553 mating system and population growth. *Proc. Natl. Acad. Sci. U. S. A.* **114**, E5474–E5481 (2017).
- 554 24. Regan, C. E., Medill, S. A., Poissant, J., et al. Causes and consequences of an unusually male-biased adult sex ratio in  
555 an unmanaged feral horse population. *Journal of Animal* (2020).
- 556 25. Charlesworth, B. The effect of life-history and mode of inheritance on neutral genetic variability. *Genet. Res.* **77**,  
557 153–166 (2001).

- 558 26. Wilson Sayres, M. A. Genetic diversity on the sex chromosomes. *Genome Biol. Evol.* **10**, 1064–1078 (2018).
- 559 27. Lind, J. M. et al. Elevated male European and female African contributions to the genomes of African American  
560 individuals. *Hum. Genet.* **120**, 713–722 (2007).
- 561 28. Hedrick, P. W. Sex: differences in mutation, recombination, selection, gene flow, and genetic drift. *Evolution* **61**,  
562 2750–2771 (2007).
- 563 29. Gardner, A. Total reproductive value of juvenile females is twice that of juvenile males under X-linkage and  
564 haplodiploidy. *J. Theor. Biol.* **359**, 236–237 (2014).
- 565 30. Hammer, M. F., Mendez, F. L., Cox, M. P., Woerner, A. E. & Wall, J. D. Sex-biased evolutionary forces shape genomic  
566 patterns of human diversity. *PLoS Genet.* **4**, e1000202 (2008).
- 567 31. Ellegren, H. The different levels of genetic diversity in sex chromosomes and autosomes. *Trends Genet.* **25**, 278–284  
568 (2009).
- 569 32. Webster, T. H. & Wilson Sayres, M. A. Genomic signatures of sex-biased demography: progress and prospects.  
570 *Curr. Opin. Genet. Dev.* **41**, 62–71 (2016).
- 571 33. Goldberg, A. & Rosenberg, N. A. Beyond 2/3 and 1/3: the complex signatures of sex-biased admixture on the X  
572 chromosome. *Genetics* **201**, 263–279 (2015).
- 573 34. Kokko, H. & Jennions, M. D. The relationship between sexual selection and sexual conflict. *Cold Spring Harb. Perspect. Biol.*  
574 **6**, a017517.
- 575 35. Corl, A. & Ellegren, H. The genomic signature of sexual selection in the genetic diversity of the sex chromosomes  
576 and autosomes. *Evolution* **66**, 2138–2149 (2012).
- 577 36. Oyler-McCance, S. J., Cornman, R. S., Jones, K. L. & Fike, J. A. Z chromosome divergence, polymorphism and  
578 relative effective population size in a genus of lekking birds. *Heredity* **115**, 452–459 (2015).
- 579 37. Irwin, D. E. Sex chromosomes and speciation in birds and other ZW systems. *Mol. Ecol.* **27**, 3831–3851 (2018).
- 580 38. Keinan, A., Mullikin, J. C., Patterson, N. & Reich, D. Accelerated genetic drift on chromosome X during the human  
581 dispersal out of Africa. *Nat. Genet.* **41**, 66–70 (2009).
- 582 39. Emery, L. S., Felsenstein, J. & Akey, J. M. Estimators of the human effective sex ratio detect sex biases on different  
583 timescales. *Am. J. Hum. Genet.* **87**, 848–856 (2010).
- 584 40. Ryman, N., Laikre, L. & Hössjer, O. Do estimates of contemporary effective population size tell us what we want to  
585 know? *Mol. Ecol.* **28**, 1904–1918 (2019).
- 586 41. Roberts, D. F. Genetic effects of population size reduction. *Nature* **220**, 1084–1088 (1968).
- 587 42. Roberts, D. F. & Bear, J. C. Measures of genetic change in an evolving population. *Hum. Biol.* **52**, 773–786 (1980).
- 588 43. MacCluer, J. W., VandeBerg, J. L., Read, B. & Ryder, O. A. Pedigree analysis by computer simulation. *Zoo Biol.* **5**,  
589 147–160 (1986).
- 590 44. Manatrion, S., Egger-Danner, C. & Baumung, R. Estimating lethal allele frequencies in complex pedigrees via gene  
591 dropping approach using the example of Brown Swiss cattle. *Arch. Anim. Breed.* **52**, 230–242 (2009).
- 592 45. Chong, J. X., Ouwenga, R., Anderson, R. L., Waggoner, D. J. & Ober, C. A population-based study of autosomal-  
593 recessive disease-causing mutations in a founder population. *Am. J. Hum. Genet.* **91**, 608–620 (2012).
- 594 46. Gratten, J., Pilkington, J. G., Brown, E. A., Clutton-Brock, T. H., Pemberton, J. M. & Slate, J. Selection and microevo-  
595 lution of coat pattern are cryptic in a wild population of sheep. *Mol. Ecol.* **21**, 2977–2990 (2012).
- 596 47. Johnston, S. E., Gratten, J., Berenos, C., Pilkington, J. G., Clutton-Brock, T. H., Pemberton, J. M. & Slate, J. Life history  
597 trade-offs at a single locus maintain sexually selected genetic variation. *Nature* **502**, 93–95 (2013).
- 598 48. Kukekova, A. V. et al. Red fox genome assembly identifies genomic regions associated with tame and aggressive  
599 behaviours. *Nat Ecol Evol* **2**, 1479–1491 (2018).
- 600 49. Fitzpatrick, J. W. & Bowman, R. Florida scrub-jays: oversized territories and group defense in a fire-maintained  
601 habitat. *Cooperative breeding in vertebrates: studies of ecology* (2016).
- 602 50. Coulon, A., Fitzpatrick, J. W., Bowman, R. & Lovette, I. J. Effects of habitat fragmentation on effective dispersal of  
603 Florida Scrub-Jays. *Conserv. Biol.* **24**, 1080–1088 (2010).
- 604 51. Aguillon, S. M., Fitzpatrick, J. W., Bowman, R., Schoech, S. J., Clark, A. G., Coop, G. & Chen, N. Deconstructing  
605 isolation-by-distance: The genomic consequences of limited dispersal. *PLoS Genet.* **13**, e1006911 (2017).

- 606 52. Suh, Y. H., Pesendorfer, M. B., Tringali, A., Bowman, R. & Fitzpatrick, J. W. Investigating social and environmental  
607 predictors of natal dispersal in a cooperative breeding bird. *Behav. Ecol.* **31**, 692–701 (2020).
- 608 53. Townsend, A. K., Bowman, R., Fitzpatrick, J. W., Dent, M. & Lovette, I. J. Genetic monogamy across variable  
609 demographic landscapes in cooperatively breeding Florida scrub-jays. *Behav. Ecol.* **22**, 464–470 (2011).
- 610 54. Chen, N., Cosgrove, E. J., Bowman, R., Fitzpatrick, J. W. & Clark, A. G. Genomic consequences of population decline  
611 in the endangered Florida Scrub-Jay. *Curr. Biol.* **26**, 2974–2979 (2016).
- 612 55. Schoech, S. J., Mumme, R. L. & Moore, M. C. Reproductive endocrinology and mechanisms of breeding inhibition in  
613 cooperatively breeding Florida Scrub Jays (*Aphelocoma coerulescens*). *Condor* **93**, 354–364 (1991).
- 614 56. Mumme, R. Do helpers increase reproductive success? *Behav. Ecol. Sociobiol.* **31** (1992).
- 615 57. Fridolfsson, A.-K. & Ellegren, H. A simple and universal method for molecular sexing of non-ratite birds. *J. Avian Biol.*  
616 **30**, 116–121 (1999).
- 617 58. Purcell, S. et al. PLINK: a tool set for whole-genome association and population-based linkage analyses. *Am. J. Hum. Genet.*  
618 **81**, 559–575 (2007).
- 619 59. R Core Team. *R: A Language and Environment for Statistical Computing* R Foundation for Statistical Computing  
620 (Vienna, Austria, 2019). <https://www.R-project.org/>.
- 621 60. Wickham, H. The Split-Apply-Combine Strategy for Data Analysis. *Journal of Statistical Software* **40**, 1–29 (2011).
- 622 61. Wickham, H., François, R., Henry, L. & Müller, K. *dplyr: A Grammar of Data Manipulation* R package version 1.0.4  
623 (2021). <https://CRAN.R-project.org/package=dplyr>.
- 624 62. Wickham, H. *ggplot2: Elegant Graphics for Data Analysis* ISBN: 978-3-319-24277-4. <https://ggplot2.tidyverse.org>  
625 (Springer-Verlag New York, 2016).
- 626 63. Wilke, C. O. *cowplot: Streamlined Plot Theme and Plot Annotations for 'ggplot2'* R package version 0.9.2 (2017).  
627 <https://CRAN.R-project.org/package=cowplot>.
- 628 64. Therneau, T. M. & Sinnwell, J. *kinship2: Pedigree Functions* R package version 1.6.4 (2015). <https://CRAN.R-project.org/package=kinship2>.
- 629
- 630 65. Microsoft & Weston, S. *foreach: Provides Foreach Looping Construct for R* R package version 1.4.4 (2017). <https://CRAN.R-project.org/package=foreach>.
- 631
- 632 66. Microsoft & Weston, S. *doParallel: Foreach Parallel Adaptor for the 'parallel' Package* R package version 1.0.14  
633 (2018). <https://CRAN.R-project.org/package=doParallel>.
- 634 67. Quinn, J. S., Woolfenden, G. E., Fitzpatrick, J. W. & White, B. N. Multi-locus DNA fingerprinting supports genetic  
635 monogamy in Florida scrub-jays. *Behav. Ecol. Sociobiol.* **45**, 1–10 (1999).
- 636 68. Reid, J. M., Nietlisbach, P., Wolak, M. E., Keller, L. F. & Arcese, P. Individuals' expected genetic contributions to  
637 future generations, reproductive value, and short-term metrics of fitness in free-living song sparrows (*Melospiza*  
638 *melodia*). *Evol. Lett.* **3**, 271–285 (2019).
- 639 69. Hunter, D. C., Pemberton, J. M., Pilkington, J. G. & Morrissey, M. B. Pedigree-based estimation of reproductive value.  
640 *J. Hered.* **110**, 433–444 (2019).
- 641 70. Grafen, A. A theory of Fisher's reproductive value. *J. Math. Biol.* **53**, 15–60 (2006).
- 642 71. Lanciani, C. A. A simple equation for presenting reproductive value to introductory biology and ecology classes.  
643 *Bulletin of the Ecological Society of America* **79**, 192–193 (1998).
- 644 72. Robertson, A. Inbreeding in artificial selection programmes. *Genet. Res.* **2**, 189–194 (1961).
- 645 73. Buffalo, V., Mount, S. M. & Coop, G. A genealogical look at shared ancestry on the X chromosome. *Genetics* **204**,  
646 57–75 (2016).
- 647 74. Grafen, A. Total reproductive values for females and for males in sexual diploids are not equal. *J. Theor. Biol.* **359**,  
648 233–235 (2014).
- 649 75. Ruzicka, F. et al. The search for sexually antagonistic genes: Practical insights from studies of local adaptation and  
650 statistical genomics. *Evolution Letters* (2020).
- 651 76. Otto, S. P. et al. About PAR: the distinct evolutionary dynamics of the pseudoautosomal region. *Trends Genet.* **27**,  
652 358–367 (2011).
